# Supplementary material
Source: Frontiers journal article supplement (https://www.frontiersin.org/articles/206796)
Supplement: Data_Sheet_1.pdf [file Data_Sheet_1.pdf]

## 1 DETAILS OF THE COORDINATE TRANSFORMATION

1 The direction cosines for spatial axis  $i$  is a normalized vector in three space such that:

$$\vec{c}_i = (c_{ix}, c_{iy}, c_{iz}). \quad (1)$$

2 Using  $\delta_i$  to represent the value of the `step` attribute for spatial axis  $i$ , and defining  $s_i$  similarly for the  
3 `start` attribute, the vector  $\vec{v}_i$  between adjacent elements along that axis is:

$$\vec{v}_i = \delta_i \vec{c}_i \quad (2)$$

4 and the origin  $(0, 0, 0)$  in voxel coordinates is located at world coordinates  $(o_x, o_y, o_z)$  as given by:

$$\begin{bmatrix} o_x \\ o_y \\ o_z \end{bmatrix} = \begin{bmatrix} c_{ix} & c_{jx} & c_{kx} \\ c_{iy} & c_{jy} & c_{ky} \\ c_{iz} & c_{jz} & c_{kz} \end{bmatrix} \begin{bmatrix} s_i \\ s_j \\ s_k \end{bmatrix} \quad (3)$$

5 Finally, any homogeneous coordinate in voxel space  $(v_x, v_y, v_z, 1)$  can be transformed to its equivalent in  
6 world space using the equation:

$$\begin{bmatrix} w_x \\ w_y \\ w_z \\ w_w \end{bmatrix} = \begin{bmatrix} c_{ix}\delta_i & c_{jx}\delta_j & c_{kx}\delta_k & o_x \\ c_{iy}\delta_i & c_{jy}\delta_j & c_{ky}\delta_k & o_y \\ c_{iz}\delta_i & c_{jz}\delta_j & c_{kz}\delta_k & o_z \\ 0 & 0 & 0 & 1 \end{bmatrix} \begin{bmatrix} v_i \\ v_j \\ v_k \\ 1 \end{bmatrix} \quad (4)$$

## 2 MINC 2.0 STRUCTURAL ATTRIBUTES

7 These attributes serve an supporting role in the definition of the MINC file itself. Many of them were  
8 required for MINC 1.0, but are no longer truly needed in MINC 2.0. They have been retained for MINC  
9 2.0 for reasons of backward compatibility.

10 Each of these attributes are mandatory for any MINC standard variable, with the following exceptions:

- 11 • The `signtype` attribute is required only for variables of integral type.
- 12 • The `parent children` attributes are required only for variables of class `group` or  
13 `var-attribute`.

14 These seven attributes are considered structural:

- 15 • `children` - List of the names of the variables that are considered children of this variable. The list is  
16 separated by newline characters.
- 17 • `comments` - A string providing supporting information about the MINC variable's meaning or  
18 interpretation.
- 19 • `dimorder` - A string identifying the names and order of the dimension variables associated with  
20 the dimensions of an HDF5 dataset. The elements are separated with a comma. For example,  
21 the `image` dataset for a transverse 3D image might have a `dimorder` attribute with the value  
22 "`zspace, yspace, xspace`". This attribute was introduced in MINC 2.0.

- 23 • `parent` - A string identifying by name the parent variable of this variable. If the string is empty (of  
24 length zero), the variable is at the root of the hierarchy.
  - 25 • `signtype` - Because MINC 1.0, unlike NetCDF, differentiates between signed and unsigned integral  
26 types, this attribute is required to define the format of variables that store data of an integral type. The  
27 string value must be either `signed_` or `unsigned`. For 8-bit integers, the default is unsigned, for  
28 all other integer types the default is signed.
  - 29 • `varid` - A string that identifies the variable's relationship to the MINC specification. All MINC  
30 standard variables should set this attribute to "MINC standard variable". Non-standard variables may  
31 either ignore this attribute or set it to some other string value.
  - 32 • `vartype` - A string identifying the class of the variable. It must be one of `group_`,  
33 `dimension_`, `dim-width_`, or `var-attribute`.
  - 34 • `version` - A string identifying the version of this variable. This string is always set to "MINC Version  
35 1.0" for MINC standard variables.
- 36 In practice, only the `signtype` and `dimorder` attributes are important to the correct interpretation of  
37 the MINC 2.0 file structure, the remaining fields are retained for informational purposes only.

### 3 MINC 2.0 INFORMATIONAL ATTRIBUTES

38 These attributes serve an informational role in that they provide supporting information about the image,  
39 study, or patient. The following lists define the most widely-used fields, some conversion tools may  
40 incorporate additional information. Unless otherwise specified, numbers are stored in double-precision  
41 floating-point format.

#### 42 3.1 image variable attributes

43 These attributes provide additional information about the state and type of the image data contained in  
44 the MINC 2.0 file.

- 45 • `complete` - A boolean attribute (with values `true_` or `false`) that indicates whether the variable  
46 has been written in its entirety. This can be used to detect program failure when writing out images as  
47 they are processed : `complete` is set to false at the beginning and set to `true_` when all data has been  
48 processed and written to the file.
- 49 • `validrange` - A vector of two numbers that specifies both the minimum and maximum valid values  
50 for this variable. Values outside this range must be treated as missing or uninitialized. In MINC, the  
51 order of the two values in the vector is not significant. This attribute should be considered mandatory  
52 for the MINC image variable, unless the variable uses the default range, which is defined to be the full  
53 range of an (possibly signed or unsigned) integer type or the interval (0.0, 1.0) for floating point types.  
54 It is not required for any other MINC variable.

#### 55 3.2 study variable attributes

56 These attributes provide ancillary information about the study for which the image was collected. The  
57 attributes are grouped with the study variable for purposes of namespace organization, and are modeled  
58 after ACR-NEMA conventions (ACR-NEMA committee, 1988). Specific DICOM fields are cited by  
59 group and element number where appropriate. All of these attributes are optional, and have no default  
60 value defined.

- 61 • `admitting_diagnosis` - A string description of the admitting diagnosis.
- 62 • `attending_physician` - A string giving the name of the physician administering the examination.
- 63 • `department` - A string identifying the department conducting the study.
- 64 • `device_model` - A string specifying the model of the imaging device.
- 65 • `institution` - A string identifying the institution conducting the study.
- 66 • `manufacturer` - A string specifying the name of the imaging device manufacturer.
- 67 • `modality` - A string that represents the imaging modality used, typically one of: PET\_\_, SPECT,
- 68 `GAMMA`, MRI\_\_, MRS\_\_, MRA\_\_, CT\_\_, DSA\_\_, DR\_\_, or label.
- 69 • `operator` - A string giving the name of the operator of the imaging device.
- 70 • `procedure` - A string description of the procedure employed.
- 71 • `radiologist` - A string giving the name of the radiologist interpreting the examination.
- 72 • `referring_physician` - A string giving the name of the patient's primary physician.
- 73 • `start_time` - A string giving the time and date of the start of the study, in the format YYYYMMDD
- 74 HHMMSS.FFFFFFFF, where FFFFFFFF is a string representation of fractional seconds. Either the entire
- 75 time representation, or the fractional seconds, may be omitted if not required.
- 76 • `station_id` - A string identifying the specific imaging system that generated the image.
- 77 • `study_id` - A string identifying the study.

### 78 3.3 patient variable attributes

79 These attributes, which provide identifying information about the patient or subject, are grouped with  
 80 the patient variable for purposes of namespace organization. They are modeled after ACR-NEMA (ACR-  
 81 NEMA committee, 1988) conventions for patient identification. All of these attributes are optional, and  
 82 have no default value defined.

- 83 • `address` - A string giving the patient's address.
- 84 • `age` - A number giving the patient's age in years.
- 85 • `birthdate` - A string specifying the patient's birthdate in the form YYYYMMDD.
- 86 • `full_name` - A string specifying the full name of the patient.
- 87 • `identification` - A string specifying identification information for the patient.
- 88 • `insurance_id` - A string giving the patient's insurance plan id.
- 89 • `other_ids` - A string giving other identification information for the patient.
- 90 • `other_names` - A string giving other names for the patient.
- 91 • `position` - A string giving the patient's position. See DICOM (0018, 5100).
- 92 • `sex` - A string specifying the patient's sex: male\_\_, female or other\_.
- 93 • `size` - A number giving the patient's height or length in meters.
- 94 • `weight` - A number giving the patient's weight in kilograms.

### 95 3.4 acquisition variable attributes

96 These attributes store parameters about the acquisition. All of these attributes are optional, and have no  
 97 default value defined.

- 98 • acquisition\_id - A string identifying this acquisition in the overall set of acquisitions.
- 99 • acquisition\_time - A string giving the time of this particular acquisition, in the same format as
- 100 study:start\_time.
- 101 • contrast\_agent - String identifying the contrast or bolus agent.
- 102 • dose\_units - A string giving units of dose.
- 103 • echo\_number - A number giving the echo number of this acquisition
- 104 • echo\_time - A number giving the time in seconds between the middle of a 90 degree pulse and the
- 105 middle of spin echo production.
- 106 • echo\_train\_length - A number giving the number of echoes. See DICOM (0018,0091).
- 107 • flip\_angle - Floating-point number specifying the number of degrees of rotation between the net
- 108 magnetization vector and the main magnetic field.
- 109 • image\_time - A string giving the time of this particular image.
- 110 • image\_type - A string giving the type of this image. See DICOM (0008,0008).
- 111 • imaged\_nucleus - A string specifying the nucleus that is resonant at the imaging frequency.
- 112 • imaging\_frequency - A number giving the precession frequency in Hz of the imaged nucleus.
- 113 • injection\_length - A number giving the time duration of the injection (in seconds).
- 114 • injection\_time - A string giving time (and date) of injection, in the same format as
- 115 study:start\_time.
- 116 • injection\_dose - Total dose of radionuclide or contrast agent injected (in units specified by
- 117 dose\_units).
- 118 • injection\_route - A string identifying administration route of injection.
- 119 • injection\_volume - A number giving the volume of injection in milliliters.
- 120 • inversion\_time - A number giving the time in seconds after the middle of the inverting RF pulse
- 121 to the middle of the 90 degree pulse to detect the amount of longitudinal magnetization.
- 122 • mr\_acq\_type - A string identifying the spatial data encoding method, e.g. "2D" or "3D". See
- 123 DICOM (0018,0023).
- 124 • num\_averages - A number of times a given pulse sequence is repeated before any parameter is
- 125 changed.
- 126 • num\_phase\_enc\_steps - A number of phase encoding steps in this MR acquisition. See DICOM
- 127 (0018,0089).
- 128 • num\_slices - A number of images in this acquisition. See DICOM (0020,1002).
- 129 • percent\_phase\_fov - A number giving the percentage of the field of view in the phase direction
- 130 compared with the field of view in the frequency direction. See DICOM (0018,0092).
- 131 • percent\_sampling - A number giving the percentage of acquisition matrix lines sampled. See
- 132 DICOM (0018,0093).
- 133 • phase\_enc\_dir - A string specifying the direction of phase encoding, either "ROW" or "COL". See
- 134 DICOM (0018,1312).
- 135 • pixel\_bandwidth - A number specifying the inverse of the sampling period, in hertz per pixel.
- 136 See DICOM (0018,0095).
- 137 • protocol - A string description of the protocol for image acquisition.

- 138 • `radionuclide` - A string specifying the isotope administered.
- 139 • `radionuclide_half-life` - A number giving the half-life of the radionuclide in seconds.
- 140 • `receive_coil` - A string giving the name of the receive coil used in an MR acquisition.
- 141 • `repetition_time` - A number giving the time in seconds between pulse sequences.
- 142 • `scanning_sequence` - A string description of type of data taken.
- 143 • `series_description` - A string giving the text description of the series.
- 144 • `series_time` - A string giving the start time of this series, in the same format as
- 145 `study:start_time`.
- 146 • `slice_order` - A string specifying the order of acquisition of individual slices, one of
- 147 `descending`, `ascending`, or `interleaved`.
- 148 • `SAR` - A number specifying the specific absorption rate in watts per kilogram.
- 149 • `slice_thickness` - A number giving the slice thickness in millimeters.
- 150 • `start_time` - A string giving the start date and time for the overall acquisition, in the same format
- 151 as `study:start_time`.
- 152 • `tracer` - A string identifying tracer labeled with radionuclide that was injected.
- 153 • `transmit_coil` - A string identifying the transmit coil used in an MR acquisition.
- 154 • `window_center` - A number specifying a linear conversion for the pixels. See DICOM
- 155 `(0020,1050)`.
- 156 • `window_width` - A number specifying a linear conversion for the pixels. See DICOM
- 157 `(0020,1051)`.

### 158 3.5 Dimension variable attributes

159 All attributes used by both dimension and dimension-width variables are described in Section 3.4.3.

## 4 DETAILED HEADER EXAMPLE

160 A standard HDF5 tool can be used to list each of the groups and datasets in a MINC 2.0 HDF5 file:

```

161 /                               Group
162 /minc-2.0                       Group
163 /minc-2.0/dimensions            Group
164 /minc-2.0/dimensions/xspace Dataset {176}
165 /minc-2.0/dimensions/yspace Dataset {SCALAR}
166 /minc-2.0/dimensions/zspace Dataset {SCALAR}
167 /minc-2.0/image                 Group
168 /minc-2.0/image/0              Group
169 /minc-2.0/image/0/image Dataset {176, 256, 256}
170 /minc-2.0/image/0/image-max Dataset {176}
171 /minc-2.0/image/0/image-min Dataset {176}
172 /minc-2.0/info                 Group
173 /minc-2.0/info/acquisition Dataset {SCALAR}
174 /minc-2.0/info/dicom_0x0008 Dataset {SCALAR}
175 ...

```

```

176 /minc-2.0/info/dicom_0x0040 Dataset {SCALAR}
177 /minc-2.0/info/dicom_0x7fe0 Dataset {SCALAR}
178 ...
179 /minc-2.0/info/patient Dataset {SCALAR}
180 /minc-2.0/info/study Dataset {SCALAR}

```

Specifically note that in this image, the `xspace` dimension variable is a vector of length 176, containing specific sampling points for each of the slices. The only image present is at full-resolution under the path `/minc-2.0/image/0`. Both the `image-min` and `image-max` variables are present, and specify per-slice scaling values over the raw voxel data in the image. Note also that most of the DICOM fields from the original conversion are preserved in the various `dicom_0xGGGG` groups. This allows MINC to carry the maximum possible amount of provenance data.

The history value has the form:

```

188 ATTRIBUTE "/minc-2.0/history" {
189     ...
190     DATA {
191         (0): "Wed Dec  8 17:49:07 2004>>> dicomserver
192             Fri Aug 14 12:39:08 2015>>> /home/rvincent/Documents/BIC/
193 minc-toolkit/build-debug/minctools/progs/mincconvert -2 /data1/users/
194 bert/nfs-bert/vincent_robert_20041208_165128_2_mri.mnc.gz vincentr.mnc"

```

This specifies that the file was created (on the Montreal Neurological Institute's DICOM server) on December 8th, 2004, and was converted to MINC 2.0 format on August, 14th 2015.

Examining the DICOM attributes, we see that the header also includes the complete 13060-character ASCII representation of the MRI scanning parameters produced by many Siemens scanners:

```

199 ATTRIBUTE "/minc-2.0/info/dicom_0x0023/el_0x0006" {
200     DATATYPE  H5T_STD_U8LE
201     DATASPACE  SIMPLE { ( 13060 ) / ( 13060 ) }
202     DATA {
203         (0): 35, 35, 35, 32, 65, 83, 67, 67, 79, 78, 86, 32, 66, ...
204         (17): 32, 35, 35, 35, 10, 117, 108, 86, 101, 114, 115, ...
205         ...
206         (13031): 86, 97, 108, 105, 100, 32, 32, 32, 32, 32, 32, ...
207         (13046): 32, 32, 32, 32, 32, 32, 32, 32, 32, 61, 32, 49, 10, 32
208     }
209 }

```

In summary, the flexibility of the header permits storage of large, arbitrarily formatted information. This can be very relevant to proper provenance implementations.

## 5 FOR MORE INFORMATION

More information about the MINC format and software is available at the following URLs:

- 213 • <https://en.wikibooks.org/wiki/MINC> - Documentation on the MINC format, library  
214 specification, and basic tools.
- 215 • <http://bic-mni.github.io/> - Binary releases of the MINC tools and documentation about  
216 additional MINC-aware tools.
- 217 • <https://github.com/BIC-MNI/libminc> - Source code of the core MINC libraries.
- 218 • <https://github.com/BIC-MNI/minctools> - Source code of the basic MINC command-  
219 line tools.
- 220 • <http://www.bic.mni.mcgill.ca/mailman/listinfo/minc-users> - Mailing list for  
221 discussion of MINC questions, ideas, and extensions.

## REFERENCES

- 222 ACR-NEMA committee (1988), Digital imaging and communication, [ftp://medical.nema.org/](ftp://medical.nema.org/medical/dicom/1988/ACR-NEMA_300-1988.pdf)  
223 [medical/dicom/1988/ACR-NEMA\\_300-1988.pdf](ftp://medical.nema.org/medical/dicom/1988/ACR-NEMA_300-1988.pdf)
